# Supplementary material for: Features of S-nitrosylation based on statistical analysis and molecular dynamics simulation: cysteine acidity, surrounding basicity, steric hindrance and local flexibility
Source: Royal Society of Chemistry journal article supplement (doi:10.1039/c4mb00322e), 2014-07-03
Supplement: c4mb00322e1.pdf [file c4mb00322e1.pdf]

## Supplementary materials:

### **Features of S-Nitrosylation Based on Statistical Analysis and Molecular Dynamic Simulation: Cysteine Acidity, Surrounding Basicity, Steric Hindrance and Local Flexibility**

Shangli Cheng,<sup>a</sup> Ting Shi,<sup>a</sup> Xiao-Lei Wang,<sup>a</sup> Liang Juan,<sup>a</sup> Hongyi Wu,<sup>a</sup> Lu Xie,<sup>b</sup>  
Yixue Li,<sup>ab</sup> and Yi-Lei Zhao<sup>\*ab</sup>

<sup>a</sup> State Key Laboratory of Microbial Metabolism, School of Life Sciences and Biotechnology,  
Shanghai Jiao Tong University, Shanghai 200240, China.

<sup>b</sup> Shanghai Center for Bioinformation Technology, Shanghai 201203, China.

## Supplementary Tables and Figures

**Supplementary Table S1** The hypothesis test for atoms of polar amino acids.

**Supplementary Table S2** The hypothesis test for atoms of acidic amino acids.

**Supplementary Table S3** The hypothesis test for atoms of basic amino acids.

**Supplementary Table S4** The hypothesis test for atoms of aromatic amino acids.

**Supplementary Table S5** The hypothesis test for atoms of aliphatic amino acids.

**Supplementary Table S6.1** The percentage difference values of different types of atoms around the sulfur of cysteine with the distance of 3.5 Å.

**Supplementary Table S6.2** The percentage difference values of different types of atoms around the sulfur of cysteine with the distance of 4 Å.

**Supplementary Table S6.3** The percentage difference values of different types of atoms around the sulfur of cysteine with the distance of 4.5 Å.

**Supplementary Table S6.4** The percentage difference values of different types of atoms around the sulfur of cysteine with the distance of 5 Å.

**Supplementary Table S6.5** The percentage difference values of different types of atoms around the sulfur of cysteine with the distance of 5.5 Å.

**Supplementary Table S6.6** The percentage difference values of different types of atoms around the sulfur of cysteine with the distance of 6 Å.

**Supplementary Table S6.7** The percentage difference values of different types of atoms around the sulfur of cysteine with the distance of 6.5 Å.

**Supplementary Table S6.8** The percentage difference values of different types of atoms around the sulfur of cysteine with the distance of 7 Å.

**Supplementary Table S6.9** The percentage difference values of different types of atoms around the sulfur of cysteine with the distance of 7.5 Å.

**Supplementary Table S6.10** The percentage difference values of different types of atoms around the sulfur of cysteine with the distance of 8 Å.

**Supplementary Table S7** The S-nitrosylated cysteines with neighboring His with the distance threshold of 5Å.

**Supplementary Figure S1 The free space around the Cys $\beta$ 93 in the R-state hemoglobin.**

**Supplementary Figure S2 The RMSD of each trajectory of R-state (a), T-state (b), dep-R-state (c) and dep-T-state (d) hemoglobin.**

**Supplementary Table S8 The S-nitrosylated cysteines used in the statistical analyses.**

**Supplementary Table S1 The hypothesis test for atoms of polar amino acids.** The atoms were categorized into eight types including carbon of main chain (C), alpha carbon of main chain (CA), nitrogen of main chain (N), oxygen of main chain (O), carbon of side chain (C\*), nitrogen of side chain (N\*), oxygen of side chain (O\*) and sulfur of side chain (S\*). The atoms were obtained with different distant thresholds (5, 5.5, 6, 6.5, 7, 7.5 and 8 Å), where the distance was from the atoms of neighboring residue to the sulfur of cysteine in protein structures.

|        | 3.5          | 4            | 4.5          | 5            | 5.5          | 6            | 6.5          | 7            | 7.5          | 8            |
|--------|--------------|--------------|--------------|--------------|--------------|--------------|--------------|--------------|--------------|--------------|
| Ser_C  | 0.250        | 0.925        | 0.485        | 0.377        | 0.909        | 0.892        | 0.647        | 0.877        | 0.769        | 0.458        |
| Ser_O  | 0.516        | 0.777        | 0.114        | 0.376        | 0.892        | 0.810        | 0.845        | 0.756        | 0.886        | 0.236        |
| Ser_N  | 0.896        | 0.531        | 0.100        | 0.203        | 0.204        | 0.340        | 0.919        | 0.187        | 0.778        | 0.509        |
| Ser_CA | <b>0.014</b> | 0.372        | 0.296        | 0.179        | 0.057        | 0.432        | 0.966        | 0.799        | 0.538        | 0.643        |
| Ser_C* | 0.082        | 0.520        | 0.087        | 0.253        | 0.729        | 0.376        | 0.537        | 0.184        | 0.591        | 0.321        |
| Ser_O* | 0.080        | 0.324        | 1.000        | 0.226        | 0.424        | 0.527        | 0.422        | 0.170        | 0.406        | 0.513        |
| Thr_C  | 1.000        | 0.139        | 0.099        | 0.463        | 0.979        | 0.559        | 0.333        | 0.789        | 0.606        | 0.754        |
| Thr_O  | 0.383        | 0.104        | 0.447        | 0.195        | 0.193        | 0.283        | 0.992        | 0.472        | 0.625        | 0.191        |
| Thr_N  | 0.458        | 0.247        | 0.370        | 0.085        | 0.074        | 0.829        | 0.925        | 0.875        | 0.793        | 0.306        |
| Thr_CA | 1.000        | 0.996        | 0.362        | <b>0.021</b> | 0.115        | 0.363        | 0.297        | 0.543        | 0.411        | 0.625        |
| Thr_C* | 0.828        | 0.590        | 0.165        | 0.251        | 0.556        | 0.300        | 0.078        | 0.122        | 0.395        | 0.282        |
| Thr_O* | 0.180        | 0.921        | 0.600        | 0.292        | 0.234        | 0.168        | 0.172        | 0.368        | 0.360        | 0.652        |
| Cys_C  | 0.066        | <b>0.005</b> | <b>0.000</b> |
| Cys_O  | <b>0.044</b> | <b>0.004</b> | <b>0.001</b> | <b>0.000</b> |
| Cys_N  | 0.508        | 0.055        | <b>0.000</b> |
| Cys_CA | <b>0.000</b> |
| Cys_C* | <b>0.000</b> |
| Cys_S* | <b>0.000</b> |
| Pro_C  | 0.563        | 0.896        | 0.951        | 0.724        | 0.867        | 0.548        | 0.272        | 0.153        | 0.249        | 0.099        |
| Pro_O  | 0.710        | 0.942        | 0.907        | 0.977        | 0.390        | 0.652        | 0.395        | 0.462        | 0.260        | <b>0.044</b> |
| Pro_N  | 0.103        | 0.336        | 0.537        | 0.103        | 0.300        | 0.540        | 0.417        | 0.475        | 0.335        | 0.376        |
| Pro_CA | 0.563        | 0.912        | 0.617        | 0.652        | 0.764        | 0.584        | 0.754        | 0.382        | 0.342        | 0.341        |
| Pro_C* | 0.439        | 0.591        | 0.910        | 0.830        | 0.795        | 0.635        | 0.537        | 0.660        | 0.464        | 0.583        |
| Asn_C  | 0.563        | 0.596        | 0.317        | 0.757        | 0.465        | 0.809        | 0.895        | 0.432        | 0.400        | 0.863        |
| Asn_O  | 0.500        | 0.403        | 0.404        | 0.377        | 0.607        | 0.500        | 0.988        | 0.666        | 0.330        | 0.922        |
| Asn_N  | 0.640        | 0.757        | 0.710        | 0.570        | 0.340        | 0.302        | 0.511        | 0.855        | 0.746        | 0.986        |
| Asn_CA | 0.563        | 0.509        | 0.672        | 0.970        | 0.526        | 0.830        | 0.828        | 0.931        | 0.618        | 0.923        |
| Asn_C* | 0.742        | 0.324        | 0.795        | 0.675        | 0.865        | 0.646        | 0.914        | 0.669        | 0.309        | 0.082        |
| Asn_O* | 0.832        | 0.289        | 0.175        | 0.175        | 0.266        | 0.361        | 0.442        | 0.061        | <b>0.030</b> | <b>0.007</b> |
| Asn_N* | 0.509        | 0.607        | 0.935        | 0.898        | 0.358        | 0.115        | 0.154        | 0.219        | 0.260        | 0.220        |
| Gln_C  | 0.413        | 0.169        | 0.807        | 0.683        | 0.852        | 0.881        | 0.619        | 0.755        | 0.715        | 0.102        |
| Gln_O  | 0.054        | 0.482        | 0.286        | 0.471        | 0.706        | 0.937        | 0.876        | 0.889        | 0.835        | 0.684        |
| Gln_N  | 0.997        | 0.203        | 0.131        | 0.924        | 0.962        | 0.417        | 0.192        | 0.204        | 0.226        | 0.169        |

---

|        |       |       |       |       |       |       |       |       |       |       |
|--------|-------|-------|-------|-------|-------|-------|-------|-------|-------|-------|
| Gln_CA | 1.000 | 0.316 | 0.214 | 0.906 | 0.820 | 0.859 | 0.739 | 0.500 | 0.260 | 0.356 |
| Gln_C* | 0.508 | 0.304 | 0.976 | 0.502 | 0.631 | 0.845 | 0.770 | 0.847 | 0.983 | 0.774 |
| Gln_O* | 0.219 | 0.839 | 0.342 | 0.958 | 0.457 | 0.940 | 0.508 | 0.917 | 0.704 | 0.727 |
| Gln_N* | 0.250 | 0.552 | 0.190 | 0.298 | 0.585 | 0.788 | 0.854 | 0.675 | 0.950 | 0.506 |

---

**Supplementary Table S2 The hypothesis test for atoms of acidic amino acids.** The atoms were categorized into eight types including carbon of main chain (C), alpha carbon of main chain (CA), nitrogen of main chain (N), oxygen of main chain (O), carbon of side chain (C\*), nitrogen of side chain (N\*), oxygen of side chain (O\*) and sulfur of side chain (S\*). The atoms were obtained with different distant thresholds (5, 5.5, 6, 6.5, 7, 7.5 and 8 Å), where the distance was from the atoms of neighboring residue to the sulfur of cysteine in protein structures.

|        | 3.5          | 4     | 4.5   | 5     | 5.5   | 6     | 6.5   | 7            | 7.5          | 8            |
|--------|--------------|-------|-------|-------|-------|-------|-------|--------------|--------------|--------------|
| Asp_C  | <b>0.005</b> | 0.106 | 0.902 | 0.191 | 0.529 | 0.472 | 0.204 | 0.503        | 0.351        | 0.702        |
| Asp_O  | <b>0.018</b> | 0.525 | 0.606 | 0.801 | 0.457 | 0.599 | 0.466 | 0.300        | 0.195        | 0.956        |
| Asp_N  | 0.179        | 0.065 | 0.123 | 0.851 | 0.464 | 0.349 | 0.971 | 0.999        | 0.911        | 0.579        |
| Asp_CA | <b>0.014</b> | 0.183 | 0.394 | 0.246 | 0.886 | 0.981 | 0.644 | 0.728        | 0.998        | 0.446        |
| Asp_C* | 0.741        | 0.222 | 0.245 | 0.353 | 0.325 | 0.778 | 0.969 | 0.567        | 0.346        | 0.454        |
| Asp_O* | 0.326        | 0.289 | 0.350 | 0.651 | 0.526 | 0.205 | 0.267 | 0.890        | 0.864        | 0.721        |
| Glu_C  | 0.997        | 0.900 | 0.699 | 0.234 | 0.321 | 0.840 | 0.182 | 0.143        | 0.074        | 0.260        |
| Glu_O  | 0.790        | 0.814 | 0.457 | 0.677 | 0.722 | 0.628 | 0.409 | 0.170        | 0.188        | 0.095        |
| Glu_N  | 0.719        | 0.847 | 0.481 | 0.883 | 0.546 | 0.113 | 0.104 | <b>0.039</b> | <b>0.030</b> | <b>0.009</b> |
| Glu_CA | 1.000        | 0.508 | 0.950 | 0.900 | 0.682 | 0.946 | 0.295 | 0.223        | 0.214        | <b>0.022</b> |
| Glu_C* | 0.384        | 0.672 | 0.495 | 0.396 | 0.546 | 0.996 | 0.589 | 0.301        | 0.804        | 0.730        |
| Glu_O* | 0.682        | 0.806 | 0.677 | 0.182 | 3.000 | 0.632 | 0.222 | 0.463        | 0.823        | 0.437        |

**Supplementary Table S3 The hypothesis test for atoms of basic amino acids.** The atoms were categorized into eight types including carbon of main chain (C), alpha carbon of main chain (CA), nitrogen of main chain (N), oxygen of main chain (O), carbon of side chain (C\*), nitrogen of side chain (N\*), oxygen of side chain (O\*) and sulfur of side chain (S\*). The atoms were obtained with different distant thresholds (5, 5.5, 6, 6.5, 7, 7.5 and 8 Å), where the distance was from the atoms of neighboring residue to the sulfur of cysteine in protein structures.

|        | 3.5          | 4            | 4.5   | 5            | 5.5   | 6     | 6.5   | 7     | 7.5   | 8     |
|--------|--------------|--------------|-------|--------------|-------|-------|-------|-------|-------|-------|
| Lys_C  | 0.441        | 0.812        | 0.338 | 0.742        | 0.448 | 0.729 | 0.905 | 0.437 | 0.388 | 0.242 |
| Lys_O  | 0.328        | 0.725        | 0.516 | 0.497        | 0.480 | 0.528 | 0.318 | 0.220 | 0.250 | 0.301 |
| Lys_N  | 0.123        | 0.062        | 0.629 | 0.418        | 0.436 | 0.486 | 0.880 | 0.909 | 0.581 | 0.321 |
| Lys_CA | 0.413        | 0.678        | 0.271 | 0.134        | 0.238 | 0.850 | 0.732 | 0.556 | 0.773 | 0.346 |
| Lys_C* | 0.180        | 0.182        | 0.600 | 0.970        | 0.664 | 0.897 | 0.704 | 0.813 | 0.617 | 0.896 |
| Lys_N* | 0.332        | 0.867        | 0.893 | 0.990        | 0.869 | 0.661 | 0.375 | 0.884 | 0.682 | 0.929 |
| Arg_C  | 0.563        | 0.609        | 0.629 | 0.815        | 0.501 | 0.853 | 0.379 | 0.509 | 0.216 | 0.130 |
| Arg_O  | 0.356        | 0.380        | 0.225 | 0.363        | 0.676 | 0.521 | 0.264 | 0.153 | 0.224 | 0.332 |
| Arg_N  | 0.762        | 0.438        | 0.881 | 0.374        | 0.625 | 0.912 | 0.958 | 0.359 | 0.467 | 0.092 |
| Arg_CA | 1.000        | 0.418        | 0.342 | 0.367        | 0.405 | 0.824 | 0.283 | 0.535 | 0.291 | 0.285 |
| Arg_C* | <b>0.014</b> | 0.351        | 0.728 | 0.999        | 0.547 | 0.741 | 0.660 | 0.269 | 0.080 | 0.183 |
| Arg_N* | 0.551        | 0.960        | 0.299 | 0.694        | 0.669 | 0.575 | 0.333 | 0.419 | 0.893 | 0.791 |
| His_C  | <b>0.021</b> | <b>0.016</b> | 0.064 | <b>0.031</b> | 0.095 | 0.528 | 0.858 | 0.842 | 0.597 | 0.589 |
| His_O  | 0.867        | 0.272        | 0.937 | 0.705        | 0.438 | 0.781 | 0.489 | 0.998 | 0.797 | 0.964 |
| His_N  | 0.102        | 0.415        | 0.771 | 0.532        | 0.691 | 0.768 | 0.973 | 0.610 | 0.774 | 0.620 |
| His_CA | <b>0.014</b> | 0.071        | 0.285 | <b>0.019</b> | 0.150 | 0.217 | 0.456 | 0.842 | 0.919 | 0.920 |
| His_C* | 0.180        | 0.298        | 0.788 | 0.430        | 0.476 | 0.281 | 0.267 | 0.582 | 0.787 | 0.960 |
| His_N* | 0.101        | <b>0.004</b> | 0.231 | 0.333        | 0.469 | 0.748 | 0.708 | 0.741 | 0.662 | 0.359 |

**Supplementary Table S4 The hypothesis test for atoms of aromatic amino acids.** The atoms were categorized into eight types including carbon of main chain (C), alpha carbon of main chain (CA), nitrogen of main chain (N), oxygen of main chain (O), carbon of side chain (C\*), nitrogen of side chain (N\*), oxygen of side chain (O\*) and sulfur of side chain (S\*). The atoms were obtained with different distant thresholds (5, 5.5, 6, 6.5, 7, 7.5 and 8 Å), where the distance was from the atoms of neighboring residue to the sulfur of cysteine in protein structures.

|        | 3.5          | 4     | 4.5          | 5            | 5.5          | 6            | 6.5          | 7            | 7.5          | 8            |
|--------|--------------|-------|--------------|--------------|--------------|--------------|--------------|--------------|--------------|--------------|
| Phe_C  | 0.563        | 0.521 | <b>0.024</b> | 0.169        | 0.118        | 0.063        | <b>0.036</b> | 0.082        | 0.076        | 0.134        |
| Phe_O  | 0.337        | 0.063 | 0.069        | 0.081        | 0.237        | 0.107        | 0.108        | 0.164        | <b>0.035</b> | <b>0.010</b> |
| Phe_N  | 0.332        | 0.135 | 0.258        | 0.187        | 0.274        | 0.053        | <b>0.030</b> | <b>0.004</b> | <b>0.018</b> | <b>0.030</b> |
| Phe_CA | 0.563        | 0.337 | <b>0.036</b> | <b>0.015</b> | 0.196        | <b>0.013</b> | 0.191        | <b>0.044</b> | <b>0.016</b> | <b>0.008</b> |
| Phe_C* | 0.629        | 0.623 | <b>0.020</b> | <b>0.019</b> | <b>0.032</b> | <b>0.036</b> | <b>0.023</b> | <b>0.005</b> | <b>0.007</b> | <b>0.009</b> |
| Tyr_C  | 1.000        | 0.705 | 0.446        | 0.224        | 0.278        | 0.448        | 0.622        | 0.576        | 0.429        | 0.329        |
| Tyr_O  | 0.477        | 0.057 | 0.131        | 0.098        | 0.079        | 0.102        | 0.288        | 0.676        | 0.473        | 0.504        |
| Tyr_N  | 0.071        | 0.666 | 0.757        | 0.449        | 0.383        | 0.671        | 0.796        | 0.528        | 0.294        | 0.460        |
| Tyr_CA | 1.000        | 0.083 | 0.481        | 0.669        | 0.725        | 0.586        | 0.617        | 0.491        | 0.806        | 0.638        |
| Tyr_C* | 0.886        | 0.492 | 0.211        | 0.509        | 0.671        | 0.874        | 0.979        | 0.832        | 0.626        | 0.633        |
| Tyr_O* | <b>0.034</b> | 0.080 | <b>0.044</b> | 0.408        | 0.256        | 0.693        | 0.147        | 0.122        | 0.107        | 0.165        |
| Trp_C  | 0.563        | 0.596 | 0.238        | 0.156        | 0.602        | 0.815        | 0.960        | 0.803        | 0.994        | 0.999        |
| Trp_O  | 0.103        | 0.626 | 0.378        | 0.248        | 0.340        | 0.726        | 0.883        | 0.938        | 0.912        | 0.764        |
| Trp_N  | 0.071        | 0.886 | 0.734        | 0.520        | 0.555        | 0.408        | 0.532        | 0.904        | 0.611        | 0.794        |
| Trp_CA | 1.000        | 0.710 | 0.910        | 0.939        | 0.311        | 0.552        | 0.818        | 0.904        | 0.795        | 0.821        |
| Trp_C* | 0.274        | 0.468 | 0.728        | 0.817        | 0.612        | 0.363        | 0.572        | 0.533        | 0.878        | 0.835        |
| Trp_N* | 0.219        | 0.117 | 0.070        | 0.171        | 0.257        | 0.952        | 0.484        | 0.528        | 0.685        | 0.909        |



**Supplementary Table S5 The hypothesis test for atoms of aliphatic amino acids.** The atoms were categorized into eight types including carbon of main chain (C), alpha carbon of main chain (CA), nitrogen of main chain (N), oxygen of main chain (O), carbon of side chain (C\*), nitrogen of side chain (N\*), oxygen of side chain (O\*) and sulfur of side chain (S\*). The atoms were obtained with different distant thresholds (5, 5.5, 6, 6.5, 7, 7.5 and 8 Å), where the distance was from the atoms of neighboring residue to the sulfur of cysteine in protein structures.

|        | 3.5          | 4     | 4.5   | 5            | 5.5          | 6            | 6.5          | 7            | 7.5          | 8            |
|--------|--------------|-------|-------|--------------|--------------|--------------|--------------|--------------|--------------|--------------|
| Gly_C  | 0.557        | 0.613 | 0.505 | 0.839        | 0.761        | 0.813        | 0.698        | 0.914        | 0.631        | 0.484        |
| Gly_O  | 0.938        | 0.809 | 0.672 | 0.275        | 0.463        | 0.457        | 0.609        | 0.379        | 0.898        | 0.885        |
| Gly_N  | <b>0.008</b> | 0.054 | 0.216 | 0.082        | <b>0.016</b> | <b>0.006</b> | <b>0.043</b> | 0.162        | 0.300        | 0.796        |
| Gly_CA | 0.719        | 0.997 | 0.529 | 0.220        | 0.178        | 0.161        | 0.182        | 0.633        | 0.483        | 0.447        |
| Ala_C  | <b>0.021</b> | 0.615 | 0.688 | 0.911        | 0.699        | 0.536        | 0.663        | 0.313        | 0.246        | 0.312        |
| Ala_O  | 0.541        | 0.590 | 0.932 | 0.373        | 0.480        | 0.633        | 0.965        | 0.621        | 0.529        | 0.746        |
| Ala_N  | 0.295        | 0.961 | 0.712 | 0.842        | 0.699        | 0.755        | 0.489        | 0.896        | 0.721        | 0.387        |
| Ala_CA | 0.084        | 0.833 | 0.708 | 0.757        | 0.617        | 0.577        | 0.731        | 0.997        | 0.427        | 0.559        |
| Ala_C* | 0.843        | 0.563 | 0.984 | 0.471        | 0.316        | 0.511        | 0.805        | 0.941        | 0.875        | 0.652        |
| Val_C  | 0.416        | 0.663 | 0.620 | 0.549        | 0.334        | 0.327        | 0.509        | 0.718        | 0.501        | 0.999        |
| Val_O  | 0.529        | 0.363 | 0.756 | 0.956        | 0.841        | 0.993        | 0.373        | 0.949        | 0.498        | 0.493        |
| Val_N  | 0.349        | 0.222 | 0.272 | 0.195        | 0.106        | 0.063        | 0.496        | 0.846        | 0.962        | 0.749        |
| Val_CA | 1.000        | 0.898 | 0.384 | 0.697        | 0.295        | 0.753        | 0.419        | 0.424        | 0.999        | 0.979        |
| Val_C* | <b>0.028</b> | 0.398 | 0.415 | 0.411        | 0.554        | 0.605        | 0.739        | 0.704        | 0.543        | 0.784        |
| Leu_C  | 0.413        | 0.816 | 0.344 | 0.461        | 0.450        | 0.684        | 0.201        | 0.627        | 0.365        | 0.178        |
| Leu_O  | 0.710        | 0.778 | 0.697 | 0.699        | 0.758        | 0.731        | 0.626        | 0.326        | 0.433        | 0.294        |
| Leu_N  | 0.165        | 0.447 | 0.953 | 0.437        | <b>0.042</b> | <b>0.007</b> | <b>0.042</b> | <b>0.026</b> | <b>0.035</b> | 0.057        |
| Leu_CA | 0.413        | 0.604 | 0.798 | 0.408        | 0.064        | <b>0.033</b> | <b>0.019</b> | <b>0.035</b> | 0.184        | 0.094        |
| Leu_C* | 0.610        | 0.134 | 0.061 | <b>0.039</b> | <b>0.010</b> | <b>0.012</b> | <b>0.010</b> | <b>0.013</b> | <b>0.011</b> | <b>0.030</b> |
| Ile_C  | 0.416        | 0.653 | 0.789 | 0.574        | 0.338        | 0.412        | 0.272        | 0.411        | 0.428        | 0.407        |
| Ile_O  | 0.607        | 0.956 | 0.704 | 0.472        | 0.584        | 0.332        | 0.348        | 0.624        | 0.297        | 0.228        |
| Ile_N  | 0.509        | 0.802 | 0.239 | 0.443        | 0.245        | 0.114        | 0.111        | 0.136        | 0.234        | 0.210        |
| Ile_CA | 0.563        | 0.843 | 0.858 | 0.888        | 0.501        | 0.621        | 0.597        | 0.191        | 0.191        | 0.349        |
| Ile_C* | 0.249        | 0.600 | 0.589 | 0.837        | 0.496        | 0.506        | 0.861        | 0.472        | 0.152        | 0.177        |
| Met_C  | 0.563        | 0.995 | 0.525 | 0.327        | 0.378        | 0.386        | 0.438        | 0.211        | 0.229        | 0.938        |
| Met_O  | 0.567        | 0.852 | 0.707 | 0.616        | 0.194        | 0.258        | 0.360        | 0.485        | 0.555        | 0.269        |
| Met_N  | 0.413        | 0.882 | 0.824 | 0.521        | 0.698        | 0.719        | 0.664        | 0.919        | 0.667        | 0.757        |
| Met_CA | 0.563        | 0.118 | 0.663 | 0.858        | 0.349        | 0.367        | 0.832        | 0.457        | 0.501        | 0.290        |
| Met_C* | 0.688        | 0.683 | 0.889 | 0.675        | 0.600        | 0.408        | 0.358        | 0.500        | 0.853        | 0.610        |
| Met_S* | 0.416        | 0.736 | 0.825 | 0.415        | 0.559        | 0.672        | 0.989        | 0.938        | 0.528        | 0.714        |



**Supplementary Table S6.1 The percentage difference values of different types of atoms around the sulfur of cysteine with the distance of 3.5 Å.** The atoms were categorized into eight types including carbon of main chain (C), alpha carbon of main chain (CA), nitrogen of main chain (N), oxygen of main chain (O), carbon of side chain (C\*), nitrogen of side chain (N\*), oxygen of side chain (O\*) and sulfur of side chain (S\*).

|     | C      | O      | N      | CA     | C*      | O*     | N*     | S*      |
|-----|--------|--------|--------|--------|---------|--------|--------|---------|
| SER | 0.41%  | -0.63% | 0.41%  | 0.62%  | -0.93%  | 1.64%  | -      | -       |
| THR | 0.00%  | 0.82%  | 0.51%  | 0.00%  | 0.41%   | 0.92%  | -      | -       |
| CYS | -1.35% | -1.24% | 0.41%  | -6.64% | -12.87% | -      | -      | -11.84% |
| PRO | -0.10% | 0.30%  | 0.82%  | -0.10% | 0.93%   | -      | -      | -       |
| ASN | -0.10% | -0.42% | 0.20%  | -0.10% | 0.00%   | 0.00%  | -0.31% | -       |
| GLN | -0.21% | -1.14% | 0.00%  | 0.00%  | -0.62%  | -0.73% | 0.41%  | -       |
| ASP | 1.34%  | 2.06%  | 0.72%  | 0.62%  | 0.10%   | 1.03%  | -      | -       |
| GLU | 0.00%  | 0.20%  | 0.20%  | 0.00%  | 1.23%   | -0.42% | -      | -       |
| LYS | 0.31%  | 0.72%  | 1.13%  | -0.21% | 0.62%   | -      | -0.52% | -       |
| ARG | -0.10% | 0.62%  | 0.20%  | 0.00%  | 1.44%   | -      | 0.51%  | -       |
| HIS | 0.83%  | -0.11% | 1.44%  | 0.62%  | 0.51%   | -      | -0.93% | -       |
| PHE | -0.10% | -1.05% | -0.52% | -0.10% | 0.50%   | -      | -      | -       |
| TYR | 0.00%  | -0.52% | 0.72%  | 0.00%  | 0.30%   | 1.13%  | -      | -       |
| TRP | -0.10% | 0.82%  | 0.72%  | 0.00%  | 1.34%   | -      | -0.73% | -       |
| GLY | -0.42% | 0.09%  | 2.37%  | 0.20%  | -       | -      | -      | -       |
| ALA | 0.83%  | -0.63% | -0.83% | 0.31%  | -0.11%  | -      | -      | -       |
| VAL | 0.21%  | 0.71%  | -0.62% | 0.00%  | 2.37%   | -      | -      | -       |
| LEU | -0.21% | -0.54% | 1.13%  | -0.21% | -0.43%  | -      | -      | -       |
| ILE | 0.21%  | 0.51%  | -0.31% | -0.10% | -1.14%  | -      | -      | -       |
| MET | -0.10% | 0.41%  | -0.21% | -0.10% | -0.01%  | -      | -      | 0.21%   |

**Supplementary Table S6.2 The percentage difference values of different types of atoms around the sulfur of cysteine with the distance of 4 Å.** The atoms were categorized into eight types including carbon of main chain (C), alpha carbon of main chain (CA), nitrogen of main chain (N), oxygen of main chain (O), carbon of side chain (C\*), nitrogen of side chain (N\*), oxygen of side chain (O\*) and sulfur of side chain (S\*).

|     | C      | O      | N      | CA      | C*      | O*     | N*     | S*      |
|-----|--------|--------|--------|---------|---------|--------|--------|---------|
| SER | 0.09%  | -0.13% | 1.12%  | -0.94%  | 0.60%   | 1.43%  | -      | -       |
| THR | 1.44%  | 2.35%  | 1.23%  | 0.00%   | 1.94%   | -0.12% | -      | -       |
| CYS | -3.01% | -3.32% | -2.81% | -11.63% | -13.61% | -      | -      | -12.90% |
| PRO | 0.41%  | 0.29%  | 1.12%  | -0.01%  | 1.61%   | -      | -      | -       |
| ASN | -0.31% | -0.84% | 0.09%  | -0.31%  | -1.25%  | -1.15% | 0.51%  | -       |
| GLN | -1.04% | -0.73% | 1.13%  | -0.31%  | -2.08%  | 0.20%  | 0.41%  | -       |
| ASP | 1.54%  | 0.91%  | 2.36%  | 0.82%   | 1.12%   | 1.53%  | -      | -       |
| GLU | -0.11% | 0.19%  | -0.22% | 0.41%   | 0.70%   | 0.50%  | -      | -       |
| LYS | -0.21% | -0.43% | 2.26%  | 0.30%   | 2.66%   | -      | -0.11% | -       |
| ARG | 0.41%  | -1.05% | 1.12%  | -0.52%  | 0.80%   | -      | -0.03% | -       |
| HIS | 1.55%  | -1.15% | 1.23%  | 1.03%   | 0.81%   | -      | 4.02%  | -       |
| PHE | -0.52% | -2.71% | -1.67% | -0.83%  | 0.30%   | -      | -      | -       |
| TYR | 0.61%  | -1.98% | 0.40%  | 1.23%   | 3.65%   | 1.64%  | -      | -       |
| TRP | -0.31% | -0.63% | 0.10%  | -0.21%  | -1.38%  | -      | -1.25% | -       |
| GLY | 0.91%  | -0.45% | 3.18%  | 0.28%   | -       | -      | -      | -       |
| ALA | 0.50%  | 0.69%  | -0.02% | -0.22%  | -1.48%  | -      | -      | -       |
| VAL | -0.64% | 2.34%  | -1.36% | 0.20%   | 2.71%   | -      | -      | -       |
| LEU | 0.09%  | 0.67%  | 0.91%  | -0.53%  | -5.80%  | -      | -      | -       |
| ILE | -0.42% | 0.08%  | 0.30%  | -0.11%  | -2.86%  | -      | -      | -       |
| MET | 0.00%  | 0.09%  | -0.11% | 0.93%   | -0.65%  | -      | -      | 0.20%   |

**Supplementary Table S6.3 The percentage difference values of different types of atoms around the sulfur of cysteine with the distance of 4.5 Å.** The atoms were categorized into eight types including carbon of main chain (C), alpha carbon of main chain (CA), nitrogen of main chain (N), oxygen of main chain (O), carbon of side chain (C\*), nitrogen of side chain (N\*), oxygen of side chain (O\*) and sulfur of side chain (S\*).

|     | C      | O      | N      | CA      | C*      | O*     | N*     | S*      |
|-----|--------|--------|--------|---------|---------|--------|--------|---------|
| SER | 1.51%  | -2.83% | 2.65%  | 1.73%   | 3.26%   | 0.27%  | -      | -       |
| THR | 3.17%  | 1.92%  | 1.12%  | 1.12%   | 4.90%   | 0.70%  | -      | -       |
| CYS | -7.27% | -5.71% | -8.94% | -12.47% | -14.97% | -      | -      | -13.12% |
| PRO | 0.39%  | 0.28%  | 0.80%  | -0.84%  | 0.11%   | -      | -      | -       |
| ASN | -1.47% | -1.16% | -0.63% | -0.42%  | -1.06%  | -1.77% | 0.50%  | -       |
| GLN | -0.33% | -1.57% | 1.74%  | -1.15%  | -1.38%  | 1.12%  | 1.23%  | -       |
| ASP | 0.07%  | 1.51%  | 2.35%  | 1.02%   | 2.54%   | 3.69%  | -      | -       |
| GLU | -0.75% | -1.37% | 0.80%  | -0.02%  | 0.25%   | 0.48%  | -      | -       |
| LYS | 1.62%  | 1.10%  | 0.70%  | 1.63%   | 1.80%   | -      | -0.11% | -       |
| ARG | -0.44% | -2.10% | 0.60%  | 1.12%   | -0.90%  | -      | -3.88% | -       |
| HIS | 2.87%  | 0.19%  | 0.81%  | 1.64%   | 2.22%   | -      | 3.59%  | -       |
| PHE | -3.65% | -3.34% | -1.57% | -2.70%  | -6.27%  | -      | -      | -       |
| TYR | -0.95% | -2.19% | 0.29%  | 1.12%   | 4.38%   | 2.56%  | -      | -       |
| TRP | -1.25% | -1.15% | 0.30%  | 0.10%   | 0.13%   | -      | -1.87% | -       |
| GLY | 1.79%  | -0.89% | 2.64%  | 2.43%   | -       | -      | -      | -       |
| ALA | 1.08%  | -0.37% | 0.79%  | 0.27%   | 0.04%   | -      | -      | -       |
| VAL | -0.26% | 1.59%  | -2.20% | -1.27%  | 6.62%   | -      | -      | -       |
| LEU | -3.27% | 1.47%  | 0.16%  | 0.27%   | -12.17% | -      | -      | -       |
| ILE | 0.06%  | -1.49% | -2.09% | -0.22%  | -2.05%  | -      | -      | -       |
| MET | -0.64% | 0.70%  | -0.22% | 0.50%   | -1.71%  | -      | -      | -0.34%  |

**Supplementary Table S6.4 The percentage difference values of different types of atoms around the sulfur of cysteine with the distance of 5 Å.** The atoms were categorized into eight types including carbon of main chain (C), alpha carbon of main chain (CA), nitrogen of main chain (N), oxygen of main chain (O), carbon of side chain (C\*), nitrogen of side chain (N\*), oxygen of side chain (O\*) and sulfur of side chain (S\*).

|     | C       | O       | N       | CA      | C*      | O*     | N*     | S*      |
|-----|---------|---------|---------|---------|---------|--------|--------|---------|
| SER | 2.00%   | -2.24%  | 2.63%   | 3.04%   | 3.14%   | 2.11%  | -      | -       |
| THR | 1.90%   | 4.89%   | 3.16%   | 4.50%   | 2.59%   | 1.51%  | -      | -       |
| CYS | -17.34% | -11.11% | -14.03% | -15.28% | -15.81% | -      | -      | -14.99% |
| PRO | -0.36%  | 0.68%   | 2.84%   | 0.98%   | 2.02%   | -      | -      | -       |
| ASN | -0.76%  | -1.69%  | -1.07%  | -0.23%  | -0.77%  | -2.30% | 0.18%  | -       |
| GLN | 0.69%   | -1.17%  | 0.07%   | 0.08%   | -0.99%  | -0.12% | 0.91%  | -       |
| ASP | -3.26%  | 1.18%   | -0.56%  | 2.13%   | 4.28%   | 1.71%  | -      | -       |
| GLU | -3.15%  | -0.98%  | 0.47%   | -0.04%  | 3.51%   | 2.32%  | -      | -       |
| LYS | 0.15%   | -2.13%  | 1.70%   | 3.47%   | 1.03%   | -      | -0.02% | -       |
| ARG | 0.37%   | -1.39%  | -2.00%  | 1.62%   | -4.47%  | -      | -2.05% | -       |
| HIS | 4.41%   | 1.21%   | -0.13%  | 3.90%   | 5.09%   | -      | 2.86%  | -       |
| PHE | -2.33%  | -3.88%  | -2.52%  | -4.59%  | -13.46% | -      | -      | -       |
| TYR | -1.90%  | -3.14%  | 1.21%   | 1.09%   | 7.27%   | 1.10%  | -      | -       |
| TRP | -2.29%  | -1.67%  | 0.81%   | -0.12%  | -1.78%  | -      | -1.67% | -       |
| GLY | 0.32%   | -2.89%  | 5.91%   | 4.25%   | -       | -      | -      | -       |
| ALA | 0.11%   | 1.87%   | -1.11%  | 0.32%   | -1.74%  | -      | -      | -       |
| VAL | -1.44%  | -0.10%  | -3.58%  | -1.31%  | 7.75%   | -      | -      | -       |
| LEU | -1.97%  | 2.26%   | -1.84%  | -2.77%  | -21.88% | -      | -      | -       |
| ILE | -1.21%  | -2.15%  | -2.33%  | 0.47%   | -0.63%  | -      | -      | -       |
| MET | -0.65%  | -0.75%  | 1.11%   | 0.08%   | -4.54%  | -      | -      | -1.48%  |

**Supplementary Table S6.5 The percentage difference values of different types of atoms around the sulfur of cysteine with the distance of 5.5 Å.** The atoms were categorized into eight types including carbon of main chain (C), alpha carbon of main chain (CA), nitrogen of main chain (N), oxygen of main chain (O), carbon of side chain (C\*), nitrogen of side chain (N\*), oxygen of side chain (O\*) and sulfur of side chain (S\*).

|     | C       | O       | N       | CA      | C*      | O*     | N*     | S*      |
|-----|---------|---------|---------|---------|---------|--------|--------|---------|
| SER | 0.21%   | -0.72%  | 3.32%   | 4.86%   | 1.26%   | 1.26%  | -      | -       |
| THR | 0.74%   | 4.97%   | 4.98%   | 4.46%   | 3.99%   | 2.01%  | -      | -       |
| CYS | -20.88% | -14.45% | -19.85% | -19.33% | -18.10% | -      | -      | -17.07% |
| PRO | -0.18%  | 2.82%   | 2.29%   | 1.16%   | 3.09%   | -      | -      | -       |
| ASN | 2.01%   | 1.29%   | 2.02%   | -1.91%  | -1.11%  | -2.20% | 1.00%  | -       |
| GLN | 0.47%   | -0.88%  | -0.26%  | 0.16%   | 1.15%   | 0.80%  | -1.37% | -       |
| ASP | 1.36%   | 1.87%   | -1.21%  | 0.34%   | 5.39%   | 2.20%  | -      | -       |
| GLU | -3.38%  | -0.49%  | -1.31%  | -1.41%  | 5.64%   | 1.99%  | -      | -       |
| LYS | 0.95%   | -2.88%  | 1.06%   | 2.51%   | 2.61%   | -      | -0.23% | -       |
| ARG | 1.48%   | -0.80%  | -1.71%  | 1.80%   | -3.38%  | -      | -2.91% | -       |
| HIS | 4.40%   | 2.54%   | -0.35%  | 3.58%   | 9.18%   | -      | 2.84%  | -       |
| PHE | -3.80%  | -2.87%  | -1.82%  | -2.87%  | -23.46% | -      | -      | -       |
| TYR | -2.33%  | -3.16%  | 1.60%   | -1.10%  | 9.74%   | 2.13%  | -      | -       |
| TRP | -1.16%  | -1.78%  | 1.22%   | -1.68%  | -2.15%  | -      | -1.67% | -       |
| GLY | 2.65%   | -2.20%  | 8.86%   | 6.18%   | -       | -      | -      | -       |
| ALA | 0.48%   | 3.05%   | -1.99%  | -1.60%  | -2.61%  | -      | -      | -       |
| VAL | -4.47%  | -0.87%  | -6.21%  | -4.27%  | 9.37%   | -      | -      | -       |
| LEU | -1.51%  | -0.79%  | -6.34%  | -6.87%  | -30.69% | -      | -      | -       |
| ILE | -3.11%  | -2.60%  | -3.51%  | -2.69%  | -5.02%  | -      | -      | -       |
| MET | -0.87%  | -2.01%  | 1.20%   | -1.18%  | -2.92%  | -      | -      | -1.60%  |

**Supplementary Table S6.6 The percentage difference values of different types of atoms around the sulfur of cysteine with the distance of 6 Å.** The atoms were categorized into eight types including carbon of main chain (C), alpha carbon of main chain (CA), nitrogen of main chain (N), oxygen of main chain (O), carbon of side chain (C\*), nitrogen of side chain (N\*), oxygen of side chain (O\*) and sulfur of side chain (S\*).

|     | C       | O       | N       | CA      | C*      | O*     | N*     | S*      |
|-----|---------|---------|---------|---------|---------|--------|--------|---------|
| SER | -1.36%  | -1.77%  | 2.56%   | 1.63%   | 1.85%   | 3.00%  | -      | -       |
| THR | 2.15%   | 4.43%   | 0.91%   | 2.26%   | 5.18%   | 3.33%  | -      | -       |
| CYS | -17.80% | -18.82% | -24.21% | -22.56% | -24.53% | -      | -      | -19.57% |
| PRO | 1.03%   | 1.56%   | 1.54%   | 2.06%   | 2.62%   | -      | -      | -       |
| ASN | 0.75%   | 2.72%   | 2.83%   | -1.20%  | 1.34%   | -2.32% | 2.43%  | -       |
| GLN | 0.87%   | 0.35%   | -2.76%  | 0.56%   | -2.09%  | -0.24% | -1.07% | -       |
| ASP | 1.65%   | 0.93%   | -2.17%  | 0.63%   | 2.97%   | 5.89%  | -      | -       |
| GLU | -1.45%  | -1.65%  | -4.03%  | 0.22%   | 4.24%   | 2.16%  | -      | -       |
| LYS | -0.11%  | -3.00%  | 1.34%   | -0.40%  | 0.38%   | -      | -0.13% | -       |
| ARG | -0.20%  | -0.92%  | -0.19%  | -0.81%  | -4.78%  | -      | -4.18% | -       |
| HIS | 2.84%   | 1.71%   | -0.26%  | 3.46%   | 11.00%  | -      | 3.85%  | -       |
| PHE | -5.37%  | -4.96%  | -5.57%  | -7.86%  | -25.11% | -0.10% | -      | -       |
| TYR | -1.94%  | -3.80%  | 0.75%   | -1.84%  | 7.87%   | 0.67%  | -      | -       |
| TRP | -0.96%  | -0.96%  | 1.94%   | -1.17%  | -6.14%  | -      | 0.29%  | -       |
| GLY | 1.17%   | -3.48%  | 11.61%  | 6.97%   | -       | -      | -      | -       |
| ALA | 3.01%   | 2.81%   | -0.92%  | -1.84%  | -1.52%  | -      | -      | -       |
| VAL | -5.24%  | -1.93%  | -8.13%  | -2.06%  | 8.71%   | -      | -      | -       |
| LEU | -1.45%  | -1.97%  | -9.92%  | -7.55%  | -46.42% | -      | -      | -       |
| ILE | -3.35%  | -3.97%  | -6.44%  | -1.60%  | -4.25%  | -      | -      | -       |
| MET | -1.30%  | -1.81%  | -0.16%  | -1.40%  | -0.48%  | -      | -      | -0.79%  |



**Supplementary Table S6.7 The percentage difference values of different types of atoms around the sulfur of cysteine with the distance of 6.5 Å.** The atoms were categorized into eight types including carbon of main chain (C), alpha carbon of main chain (CA), nitrogen of main chain (N), oxygen of main chain (O), carbon of side chain (C\*), nitrogen of side chain (N\*), oxygen of side chain (O\*) and sulfur of side chain (S\*).

|     | C       | O       | N       | CA      | C*      | O*     | N*     | S*      |
|-----|---------|---------|---------|---------|---------|--------|--------|---------|
| SER | -0.27%  | -1.08%  | 1.69%   | -1.20%  | 1.31%   | 3.80%  | -      | -       |
| THR | 2.74%   | 0.06%   | -0.48%  | 3.15%   | 6.36%   | 3.70%  | -      | -       |
| CYS | -22.57% | -21.83% | -27.65% | -28.48% | -27.34% | -      | -      | -24.23% |
| PRO | 3.07%   | 2.25%   | 2.34%   | 1.20%   | 5.54%   | -      | -      | -       |
| ASN | -0.20%  | 0.42%   | 1.87%   | 0.73%   | -0.97%  | 1.69%  | 2.83%  | -       |
| GLN | 2.50%   | 0.64%   | -3.92%  | -0.40%  | -1.83%  | 0.88%  | -0.26% | -       |
| ASP | 2.23%   | 2.44%   | 1.81%   | -0.65%  | 2.82%   | 8.02%  | -      | -       |
| GLU | -5.10%  | -3.34%  | -6.35%  | -2.82%  | 4.69%   | 4.92%  | -      | -       |
| LYS | -1.80%  | -4.80%  | 0.16%   | -0.24%  | -0.32%  | -      | -1.28% | -       |
| ARG | -2.91%  | -3.84%  | 0.18%   | -4.46%  | -4.75%  | -      | -6.29% | -       |
| HIS | 2.20%   | 3.14%   | 1.69%   | 3.55%   | 11.57%  | -      | 3.73%  | -       |
| PHE | -8.30%  | -5.60%  | -7.26%  | -5.61%  | -37.14% | -0.10% | -      | -       |
| TYR | -1.25%  | -2.27%  | 0.72%   | -2.28%  | 4.84%   | 3.34%  | -      | -       |
| TRP | -0.66%  | -0.45%  | 1.93%   | -0.04%  | -5.59%  | -      | 1.62%  | -       |
| GLY | 0.51%   | -2.48%  | 8.57%   | 6.41%   | -       | -      | -      | -       |
| ALA | 0.99%   | 2.35%   | -2.73%  | -1.49%  | 0.81%   | -      | -      | -       |
| VAL | -4.58%  | -6.01%  | -4.90%  | -6.06%  | 4.95%   | -      | -      | -       |
| LEU | -6.37%  | -2.84%  | -10.20% | -11.14% | -55.95% | -      | -      | -       |
| ILE | -5.15%  | -4.11%  | -6.19%  | -2.40%  | -1.12%  | -      | -      | -       |
| MET | -1.52%  | -1.72%  | -0.39%  | 0.03%   | -1.77%  | -      | -      | 0.03%   |

**Supplementary Table S6.8 The percentage difference values of different types of atoms around the sulfur of cysteine with the distance of 7 Å.** The atoms were categorized into eight types including carbon of main chain (C), alpha carbon of main chain (CA), nitrogen of main chain (N), oxygen of main chain (O), carbon of side chain (C\*), nitrogen of side chain (N\*), oxygen of side chain (O\*) and sulfur of side chain (S\*).

|     | C       | O       | N       | CA      | C*      | O*     | N*     | S*      |
|-----|---------|---------|---------|---------|---------|--------|--------|---------|
| SER | 0.93%   | -1.33%  | -4.46%  | -1.64%  | 5.71%   | 6.03%  | -      | -       |
| THR | 1.25%   | -4.01%  | 1.43%   | 1.24%   | 8.25%   | 2.42%  | -      | -       |
| CYS | -25.38% | -21.24% | -30.26% | -32.85% | -29.42% | -      | -      | -29.84% |
| PRO | 5.20%   | 2.62%   | 3.34%   | 4.58%   | 8.24%   | -      | -      | -       |
| ASN | -2.71%  | -1.98%  | 0.07%   | 0.40%   | 2.39%   | 4.05%  | 2.71%  | -       |
| GLN | 1.85%   | 1.13%   | -4.05%  | -0.94%  | -2.71%  | -0.68% | 0.25%  | -       |
| ASP | 1.37%   | 3.13%   | 1.88%   | 2.11%   | -1.78%  | 3.11%  | -      | -       |
| GLU | -4.53%  | -4.63%  | -9.60%  | -3.89%  | 7.82%   | 4.67%  | -      | -       |
| LYS | -4.63%  | -6.28%  | -0.82%  | -0.18%  | -5.79%  | -      | 0.76%  | -       |
| ARG | -1.92%  | -6.35%  | -3.58%  | -2.84%  | -8.57%  | -      | -7.68% | -       |
| HIS | 1.98%   | 2.18%   | 4.04%   | 2.70%   | 12.76%  | -      | 2.57%  | -       |
| PHE | -7.40%  | -5.22%  | -10.82% | -7.51%  | -49.45% | -0.10% | -      | -       |
| TYR | -1.58%  | -1.06%  | -2.51%  | -1.68%  | 4.89%   | 4.26%  | -      | -       |
| TRP | -0.87%  | -0.15%  | 0.78%   | -0.15%  | -4.01%  | -      | 1.72%  | -       |
| GLY | -2.12%  | -4.50%  | 7.88%   | 3.78%   | -       | -      | -      | -       |
| ALA | -4.12%  | 0.53%   | -0.12%  | 0.63%   | 2.40%   | -      | -      | -       |
| VAL | -4.34%  | -3.39%  | -1.57%  | -5.60%  | -4.83%  | -      | -      | -       |
| LEU | -2.63%  | -7.05%  | -12.15% | -12.26% | -64.87% | -      | -      | -       |
| ILE | -3.66%  | -0.85%  | -5.85%  | -6.79%  | -6.71%  | -      | -      | -       |
| MET | -2.68%  | -1.33%  | 0.52%   | -0.92%  | -2.04%  | -      | -      | 0.94%   |

**Supplementary Table S6.9 The percentage difference values of different types of atoms around the sulfur of cysteine with the distance of 7.5 Å.** The atoms were categorized into eight types including carbon of main chain (C), alpha carbon of main chain (CA), nitrogen of main chain (N), oxygen of main chain (O), carbon of side chain (C\*), nitrogen of side chain (N\*), oxygen of side chain (O\*) and sulfur of side chain (S\*).

|     | C       | O       | N       | CA      | C*      | O*     | N*     | S*      |
|-----|---------|---------|---------|---------|---------|--------|--------|---------|
| SER | -0.15%  | -0.23%  | 0.96%   | -2.41%  | 3.29%   | 5.16%  | -      | -       |
| THR | -2.53%  | -2.41%  | 0.76%   | 1.82%   | 2.68%   | 2.79%  | -      | -       |
| CYS | -31.00% | -23.02% | -32.86% | -33.39% | -33.17% | -      | -      | -33.48% |
| PRO | 4.65%   | 5.07%   | 4.13%   | 5.79%   | 9.28%   | -      | -      | -       |
| ASN | -4.30%  | -4.70%  | 0.66%   | -2.11%  | 5.13%   | 5.98%  | 1.75%  | -       |
| GLN | -0.56%  | 0.59%   | -4.91%  | -2.51%  | -0.30%  | -1.22% | -0.18% | -       |
| ASP | 4.01%   | 5.57%   | 1.32%   | 0.21%   | -3.61%  | 4.49%  | -      | -       |
| GLU | -6.96%  | -5.50%  | -10.38% | -5.17%  | 4.12%   | 3.60%  | -      | -       |
| LYS | -7.79%  | -6.85%  | -5.63%  | -5.08%  | -2.82%  | -      | 2.50%  | -       |
| ARG | -5.48%  | -5.57%  | -3.21%  | -4.43%  | -20.88% | -      | -5.77% | -       |
| HIS | 4.12%   | 2.38%   | 3.70%   | 2.27%   | 9.89%   | -      | 3.47%  | -       |
| PHE | -7.65%  | -8.78%  | -9.42%  | -9.31%  | -59.21% | -0.10% | -      | -       |
| TYR | -1.19%  | -2.12%  | -3.99%  | -0.88%  | 11.15%  | 4.13%  | -      | -       |
| TRP | -0.36%  | -0.05%  | -0.68%  | 0.25%   | -2.23%  | -      | 2.64%  | -       |
| GLY | -2.91%  | -2.70%  | 6.06%   | 5.38%   | -       | -      | -      | -       |
| ALA | -5.95%  | -3.35%  | -1.85%  | -3.57%  | 1.30%   | -      | -      | -       |
| VAL | -7.53%  | 2.52%   | -0.61%  | -1.12%  | -11.83% | -      | -      | -       |
| LEU | -4.79%  | -4.96%  | -13.81% | -10.08% | -69.09% | -      | -      | -       |
| ILE | -1.98%  | -3.81%  | -4.58%  | -6.32%  | -23.57% | -      | -      | -       |
| MET | -3.01%  | -1.46%  | -0.96%  | -0.43%  | 3.69%   | -      | -      | 1.54%   |

**Supplementary Table S6.10 The percentage difference values of different types of atoms around the sulfur of cysteine with the distance of 8 Å.** The atoms were categorized into eight types including carbon of main chain (C), alpha carbon of main chain (CA), nitrogen of main chain (N), oxygen of main chain (O), carbon of side chain (C\*), nitrogen of side chain (N\*), oxygen of side chain (O\*) and sulfur of side chain (S\*).

|     | C       | O       | N       | CA      | C*      | O*     | N*     | S*      |
|-----|---------|---------|---------|---------|---------|--------|--------|---------|
| SER | -2.47%  | -4.33%  | -2.28%  | -0.60%  | 6.34%   | 5.94%  | -      | -       |
| THR | -3.41%  | -7.95%  | 3.81%   | 1.46%   | 4.14%   | 1.09%  | -      | -       |
| CYS | -31.75% | -26.77% | -33.81% | -34.03% | -35.47% | -      | -      | -38.05% |
| PRO | 8.85%   | 8.75%   | 5.13%   | 5.35%   | 11.66%  | -      | -      | -       |
| ASN | -3.31%  | -2.05%  | -0.92%  | -1.53%  | 9.09%   | 7.81%  | 2.45%  | -       |
| GLN | -5.34%  | -1.62%  | -6.07%  | -2.64%  | 2.21%   | -0.72% | 1.34%  | -       |
| ASP | 2.52%   | 0.25%   | -0.47%  | 4.41%   | -3.69%  | 2.04%  | -      | -       |
| GLU | -5.98%  | -8.86%  | -12.79% | -10.39% | -1.88%  | 6.01%  | -      | -       |
| LYS | -10.42% | -8.65%  | -8.78%  | -7.71%  | -5.85%  | -      | 1.13%  | -       |
| ARG | -8.41%  | -6.96%  | -8.41%  | -4.26%  | -24.72% | -      | -7.61% | -       |
| HIS | 4.93%   | 2.87%   | 3.68%   | 2.97%   | 13.43%  | -      | 6.22%  | -       |
| PHE | -6.77%  | -11.72% | -9.56%  | -12.35% | -73.67% | -0.31% | -      | -       |
| TYR | -3.40%  | -2.36%  | -3.60%  | -1.84%  | 15.41%  | 3.90%  | -      | -       |
| TRP | 0.24%   | 0.14%   | -0.28%  | 0.66%   | -2.03%  | -      | 1.49%  | -       |
| GLY | -3.30%  | -2.25%  | 3.20%   | 7.06%   | -       | -      | -      | -       |
| ALA | -6.23%  | -0.95%  | -5.32%  | -2.92%  | 6.30%   | -      | -      | -       |
| VAL | -3.17%  | 3.05%   | 3.87%   | -1.70%  | -9.77%  | -      | -      | -       |
| LEU | -7.98%  | -6.63%  | -14.42% | -12.96% | -68.37% | -      | -      | -       |
| ILE | -3.89%  | -6.16%  | -5.46%  | -4.62%  | -31.84% | -      | -      | -       |
| MET | 0.27%   | -3.14%  | 0.47%   | -3.04%  | 2.49%   | -      | -      | 1.62%   |

**Supplementary Table S7 The S-nitrosylated cysteines with neighboring His in the distance threshold of 5Å.**

| Protein No. | S-nitroso Site | PDB No. | Chain | Site   | Neighboring His                 | Ref.              |
|-------------|----------------|---------|-------|--------|---------------------------------|-------------------|
| P03252      | 122            | 1AVP    | A     | 122    | HisA54                          | 14525973          |
| Q99KI0      | 126;410        | 1B0J    | A     | 99;358 | HisA98;HisA147,HisA167          | 19101475          |
| P50247      | 195            | 1B3R    | A     | 194    | HisA352                         | 20837516          |
| P69905      | 105            | 1BZ1    | A     | 105    | HisA104                         | 17350155          |
| P02638      | 85             | 1CFP    | A     | 84     | HisA85                          | 15590070          |
| Q8BV14      | 158            | 1DIR    | A     | 157    | HisA154                         | 20837516          |
| P68871      | 94             | 1DXT    | B     | 94     | HisB147                         | 8637569;9843411   |
| P25779      | 147            | 1EWP    | A     | 25     | HisA159                         | 10753643          |
| Q02293      | 299            | 1FT1    | B     | 299    | HisB362                         | 16418269          |
| P98170      | 327            | 1G73    | C     | 327    | HisC302,HisC320,                | 19273858          |
| P09382      | 61             | 1GZW    | B     | 60     | HisB44,                         | 18335467;19366988 |
| P52197      | 230            | 1H4K    | X     | 230    | HisX229,HisX233,HisX234         | 12821142          |
| P42123      | 164            | 1I0Z    | A     | 163    | HisA193                         | 17629318          |
| P0ACQ4      | 199            | 1I6A    | A     | 199    | HisA198,                        | 14993439;15688001 |
| P06213      | 1083           | 1IRK    | A     | 1056   | HisA1057,HisA1058               | 11225731          |
| P26443      | 112;254        | 1L1F    | A     | 59;201 | HisA86;HisA199,                 | 20837516          |
| P14780      | 99             | 1L6J    | A     | 99     | HisA190,HisA401,HisA405,HisA411 | 12183632          |
| P07237      | 53;56          | 1MEK    | A     | 36;39  | HisA38;HisA38                   | 16724068          |
| P16331      | 265            | 1PHZ    | A     | 265    | HisA264                         | 20837516          |
| Q9QUR7      | 115            | 1PIN    | A     | 113    | HisA59                          | 16418269          |
| P35505      | 396            | 1QQJ    | A     | 396    | HisA395                         | 20837516          |
| Q9QXF8      | 247            | 1R8X    | A     | 246    | HisA245                         | 20837516          |
| O35490      | 256            | 1UMY    | A     | 256    | HisA218                         | 20837516          |
| O75832      | 107            | 1UOH    | A     | 107    | HisA111                         | 18395505          |
| Q9DC50      | 210            | 1XMD    | A     | 210    | HisA207                         | 20837516          |
| P04406      | 152            | 1ZNQ    | O     | 152    | HisO179                         | 17540725          |
| Q8K2B3      | 238            | 1ZOY    | A     | 196    | HisA203                         | 20837516          |
| P0A7M9      | 37             | 2AW4    | Z     | 37     | HisZ41                          | 19483679          |
| P21399      | 437            | 2B3X    | A     | 437    | HisA178                         | 7579417           |
| Q9Y696      | 234            | 2D2Z    | A     | 234    | His196                          | 16648260          |

|            |         |               |   |             |                 |                             |
|------------|---------|---------------|---|-------------|-----------------|-----------------------------|
| P04271     | 85      | 2H61          | A | 84          | His85           | 15590070                    |
| P15105     | 183     | 2UU7          | A | 183         | HisA179         | 20837516                    |
| P69897     | 12      | 2XRP          | A | 12          | HisA139         | 16418269                    |
| Q8VDN<br>2 | 663     | 3B8E          | A | 656         | HisA678         | 20837516                    |
| P63242     | 73      | 3CPF          | A | 73          | HisA77          | 19101475                    |
| O15519     | 259     | 3H11          | A | 259         | HisA283         | 16246840                    |
| P02088     | 94      | 3HRW/<br>1HHO | B | 93          | HisB92          | 20837516                    |
| P21980     | 10      | 3LY6          | A | 10          | HisA44          | 11305905                    |
| P63085     | 159     | 3O71          | A | 159         | HisA123         | 19101475;194<br>83679       |
| P05202     | 187     | 3PD6          | A | 187         | HisA373         | 19483679                    |
| O08749     | 484     | 3RNM          | A | 449         | HisA450         | 20837516                    |
| P21980     | 277;336 | 3S3J          | A | 277;33<br>6 | HisA335;HisA335 | 11305905                    |
| P68036     | 86      | 3SQV          | C | 86          | HisC119         | 19483679<br>17629318;183    |
| P11980     | 358     | 3SRF          | C | 357         | HisC463         | 35467;193669<br>88          |
| P07237     | 400     | 3UEM          | A | 400         | HisA399         | 16724068<br>11983891;127    |
| P02769     | 58      | 3V03          | A | 34          | HisA39          | 06341;171353<br>41;18273439 |
| Q05193     | 607     | 3ZVR          | A | 607         | HisA584         | 16432212                    |
| P04642     | 163     | 4AJ4          | A | 162         | HisA192         | 17629318                    |
| P43235     | 139     | 7PCK          | A | 25          | HisA162         | 10521264                    |

**Supplementary Figure S1** The interactions between Cys $\beta$ 93 and basic residues of His $\beta$ 143, Lys $\beta$ 144. The blue atoms were N; the red atoms were O; the white atoms were H; the gray atoms were C; the golden atoms were S.

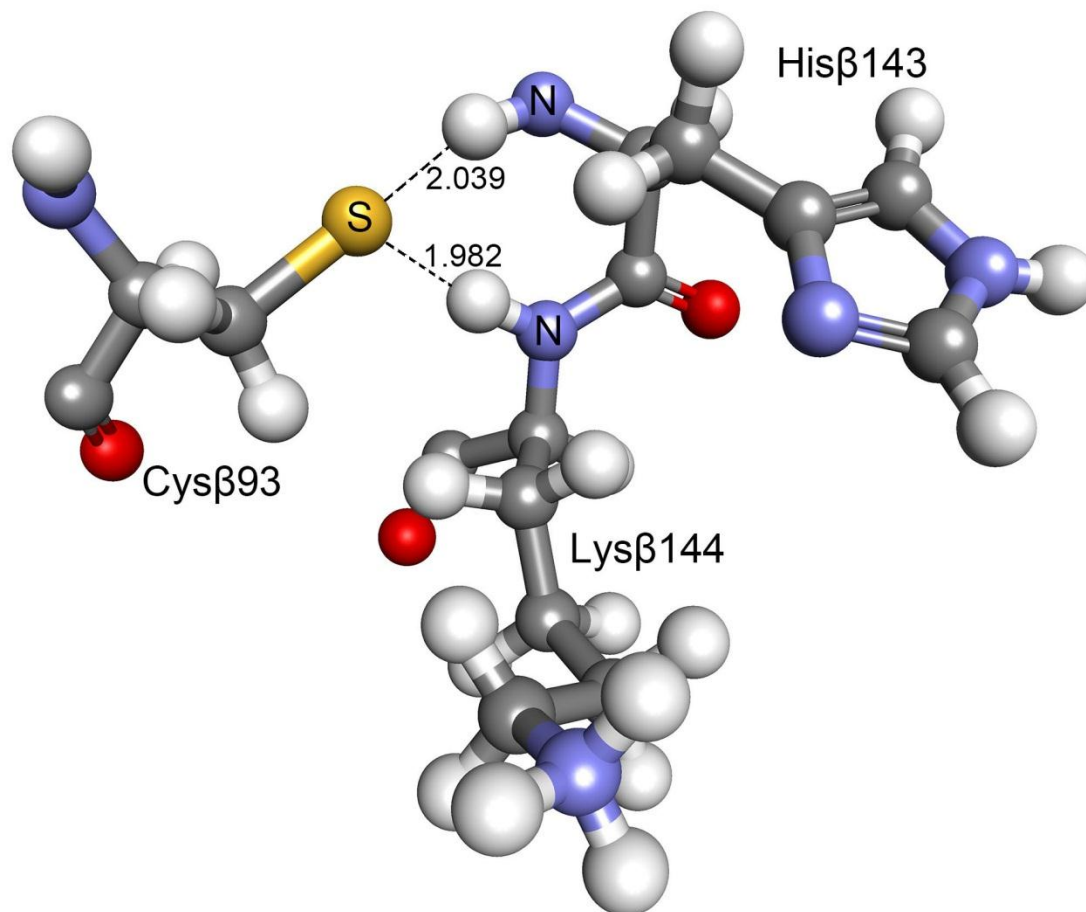

**Supplementary Figure S2 The distribution of neighboring atoms in S-nitrosylated and non-S-nitrosylated cysteines.**

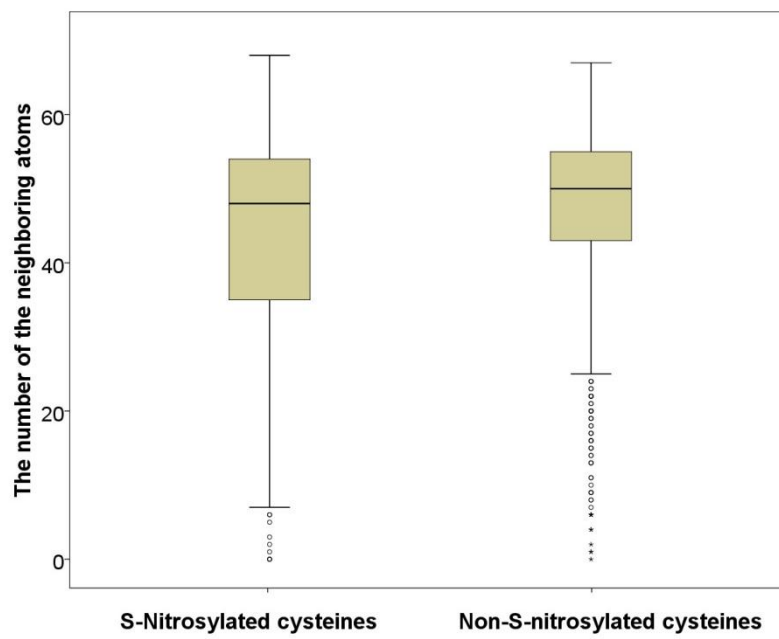



**Supplementary Figure S3. The free space around the Cys $\beta$ 93 in the R-state hemoglobin.** The 'CYS234' was the Cys $\beta$ 93 in hemoglobin. The green cross (+) represents the space in protein structure. The white atom was 'H'. The gray atom was 'C'. The blue atom was 'N'. The red atom was 'O'. The yellow atom was 'S'. The volume of green-cross space was **26.25 Å<sup>3</sup>**. The space was analyzed using 1HHO.pdb.

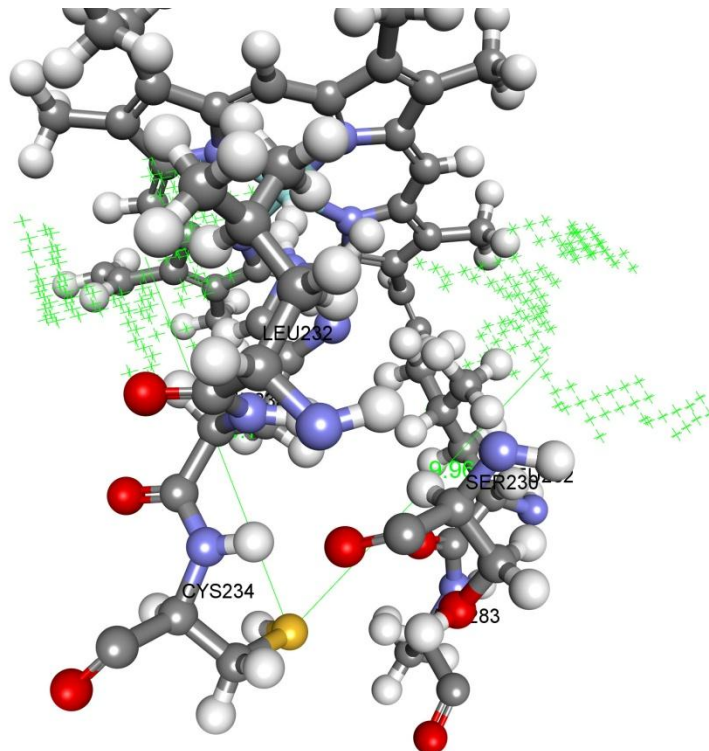

**Supplementary Figure S4 The RMSD of each trajectory of R-state (a), T-state (b), dep-R-state (c) and dep-T-state (d) hemoglobin.** For each state of hemoglobin, the molecular dynamics simulation had been repeated 14 times.

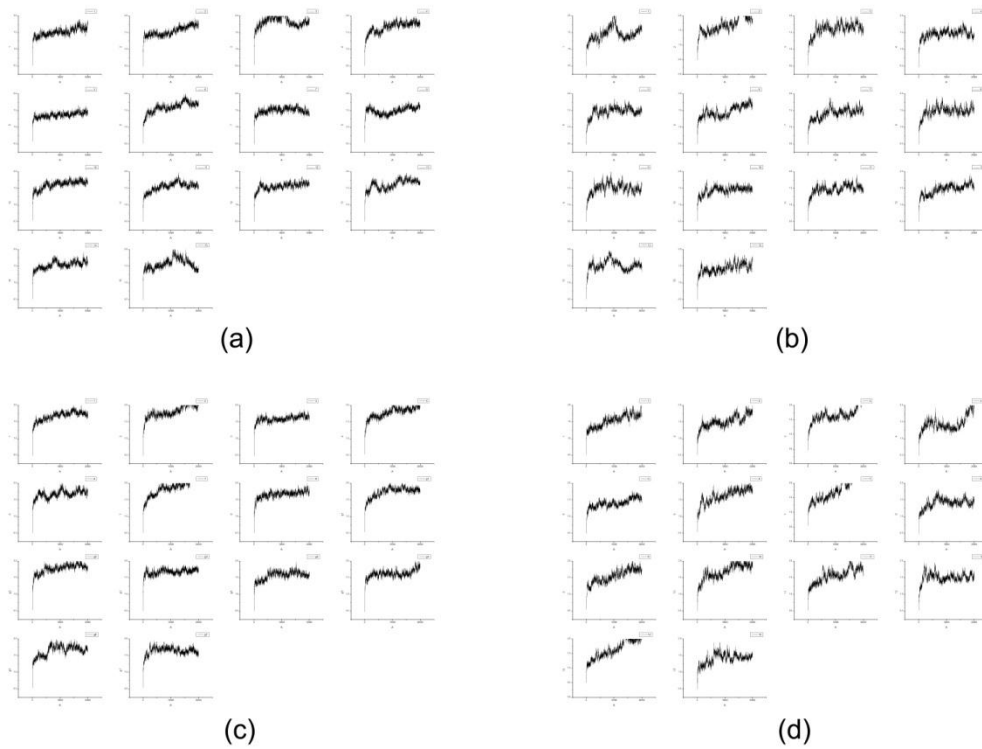

**Supplementary Figure S5** The average structures of the dep-T-state and T-state hemoglobins. The dep-T-state hemoglobin was colored in yellow. The T-state hemoglobin was colored in blue.

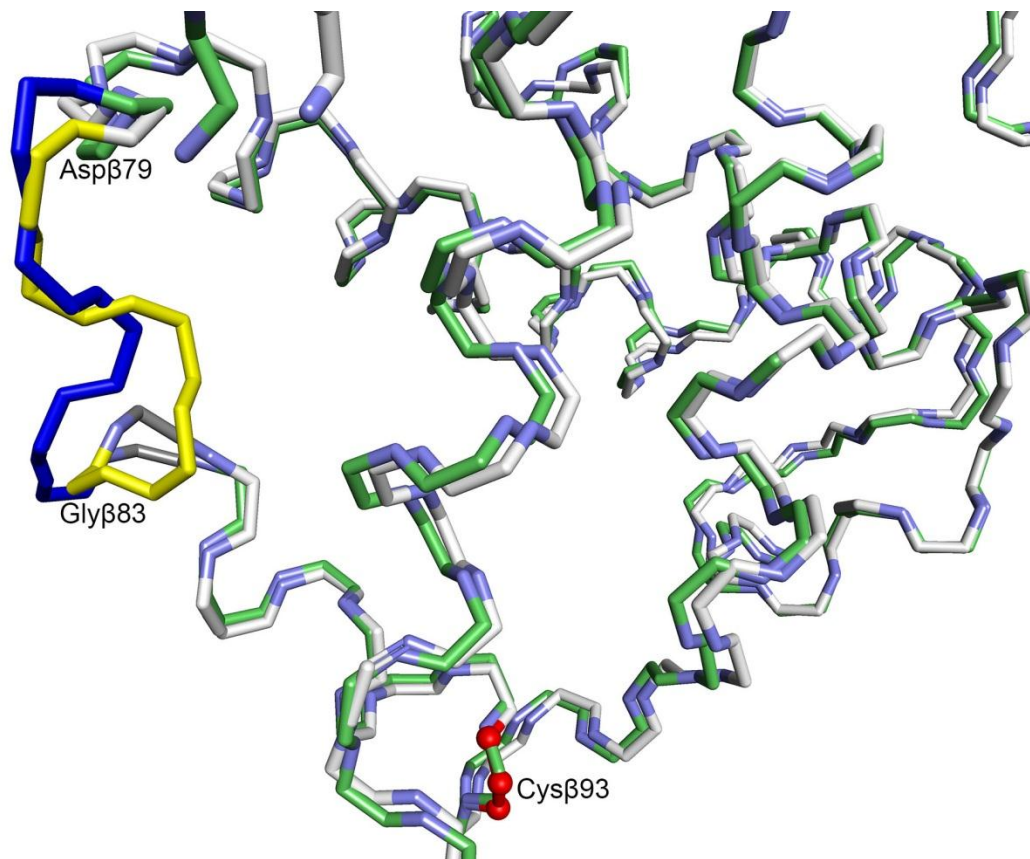

**Supplementary Table S8 The S-nitrosylated cysteines used in the statistical analyses.**

| Protein No. | Site | PDB No. | Chain | Site | Reference/WebServer |
|-------------|------|---------|-------|------|---------------------|
| P09211      | 102  | 12GS    | A     | 101  | SnoPred             |
| P09211      | 48   | 12GS    | A     | 47   | SnoPred             |
| P62826      | 112  | 1A2K    | C     | 112  | GPS-SNO             |
| P62826      | 120  | 1A2K    | C     | 120  | GPS-SNO             |
| P18031      | 32   | 1A5Y    | A     | 32   | GPS-SNO             |
| P18031      | 92   | 1A5Y    | A     | 92   | GPS-SNO             |
| P13448      | 113  | 1AHJ    | A     | 113  | GPS-SNO             |
| Q9R0P5      | 23   | 1AK6    | A     | 23   | GPS-SNO             |
| P02768      | 583  | 1AO6    | A     | 559  | SnoPred             |
| P63329      | 228  | 1AUI    | A     | 228  | GPS-SNO             |
| P03252      | 122  | 1AVP    | A     | 122  | SnoPred             |
| P17918      | 135  | 1AXC    | A     | 135  | GPS-SNO             |
| P17918      | 162  | 1AXC    | A     | 162  | GPS-SNO             |
| Q99KI0      | 385  | 1B0J    | A     | 358  | 20837516            |
| Q99KI0      | 410  | 1B0J    | A     | 383  | 20837516            |
| Q99KI0      | 126  | 1B0J    | A     | 99   | 20837516            |
| P50247      | 195  | 1B3R    | A     | 194  | 20837516            |
| P50247      | 228  | 1B3R    | A     | 227  | 20837516            |
| P69905      | 105  | 1BZ1    | A     | 105  | GPS-SNO             |
| P32020      | 495  | 1C44    | A     | 71   | 20837516            |
| P02638      | 85   | 1CFP    | A     | 84   | SnoPred             |
| P47712      | 151  | 1CJY    | A     | 151  | GPS-SNO             |
| P34914      | 230  | 1CQZ    | A     | 230  | 20837516            |
| P0A6L2      | 218  | 1DHP    | A     | 218  | GPS-SNO             |
| Q8BVI4      | 158  | 1DIR    | A     | 157  | 20837516            |
| P30046      | 24   | 1DPT    | A     | 23   | GPS-SNO             |
| Q8BH95      | 225  | 1DUB    | A     | 225  | 20837516            |
| P68871      | 94   | 1DXT    | B     | 94   | SnoPred             |
| P15121      | 299  | 1EL3    | A     | 298  | GPS-SNO             |
| Q60864      | 26   | 1ELW    | A     | 26   | GPS-SNO             |
| P25779      | 147  | 1EWP    | A     | 25   | GPS-SNO             |
| P17117      | 9    | 1F5V    | A     | 9    | GPS-SNO             |
| Q91Y97      | 135  | 1FDJ    | A     | 1134 | 20837516            |
| Q91Y97      | 158  | 1FDJ    | A     | 1157 | 20837516            |
| Q91Y97      | 336  | 1FDJ    | A     | 1335 | 20837516            |
| P16015      | 187  | 1FLJ    | A     | 188  | 20837516            |
| Q02293      | 299  | 1FT1    | B     | 299  | GPS-SNO             |
| P07335      | 254  | 1G0W    | A     | 254  | GPS-SNO             |
| P07335      | 283  | 1G0W    | A     | 283  | GPS-SNO             |
| P98170      | 327  | 1G73    | C     | 327  | GPS-SNO             |
| P50398      | 317  | 1GND    | A     | 317  | GPS-SNO             |
| P09382      | 61   | 1GZW    | B     | 60   | GPS-SNO             |

|        |      |      |   |      |          |
|--------|------|------|---|------|----------|
| Q16665 | 800  | 1H2M | S | 800  | GPS-SNO  |
| P52197 | 230  | 1H4K | X | 230  | GPS-SNO  |
| P10242 | 130  | 1H88 | C | 130  | GPS-SNO  |
| P00493 | 106  | 1HMP | A | 105  | GPS-SNO  |
| P42123 | 164  | 1I0Z | A | 163  | SnoPred  |
| P0ACQ4 | 199  | 1I6A | A | 199  | GPS-SNO  |
| P06213 | 1083 | 1IRK | A | 1056 | GPS-SNO  |
| P06213 | 1165 | 1IRK | A | 1138 | GPS-SNO  |
| P06213 | 1261 | 1IRK | A | 1234 | GPS-SNO  |
| P06213 | 1272 | 1IRK | A | 1245 | GPS-SNO  |
| P04797 | 154  | 1J0X | O | 153  | GPS-SNO  |
| P04797 | 245  | 1J0X | O | 244  | GPS-SNO  |
| P37040 | 472  | 1J9Z | A | 472  | 20837516 |
| P37040 | 566  | 1J9Z | A | 566  | 20837516 |
| P37040 | 630  | 1J9Z | A | 630  | 20837516 |
| P35754 | 79   | 1JHB | A | 79   | GPS-SNO  |
| P35754 | 8    | 1JHB | A | 8    | GPS-SNO  |
| P35754 | 83   | 1JHB | A | 83   | GPS-SNO  |
| P0AGE9 | 124  | 1JKJ | A | 123  | GPS-SNO  |
| P26443 | 172  | 1L1F | A | 119  | 20837516 |
| P26443 | 254  | 1L1F | A | 201  | 20837516 |
| P26443 | 112  | 1L1F | A | 59   | 20837516 |
| P14780 | 99   | 1L6J | A | 99   | GPS-SNO  |
| P33198 | 305  | 1LWD | A | 297  | GPS-SNO  |
| P33198 | 387  | 1LWD | A | 379  | GPS-SNO  |
| P54071 | 113  | 1LWD | A | 74   | 20837516 |
| Q9D0F9 | 374  | 1LXT | A | 373  | 20837516 |
| P10111 | 161  | 1M9E | A | 161  | GPS-SNO  |
| P17742 | 62   | 1M9E | A | 62   | 20837516 |
| P08133 | 114  | 1M9I | A | 114  | 19854201 |
| P07237 | 53   | 1MEK | A | 36   | GPS-SNO  |
| P07237 | 56   | 1MEK | A | 39   | GPS-SNO  |
| P05109 | 42   | 1MR8 | A | 42   | GPS-SNO  |
| P07014 | 75   | 1NEK | B | 75   | GPS-SNO  |
| P29473 | 101  | 1NSE | A | 101  | SnoPred  |
| P29473 | 96   | 1NSE | A | 96   | SnoPred  |
| P11884 | 321  | 1O05 | A | 302  | SnoPred  |
| P47738 | 388  | 1O05 | A | 369  | 20837516 |
| P47738 | 68   | 1O05 | A | 49   | GPS-SNO  |
| Q05962 | 160  | 1OKC | A | 159  | GPS-SNO  |
| Q05962 | 257  | 1OKC | A | 256  | GPS-SNO  |
| Q92854 | 135  | 1OLZ | A | 114  | 19854201 |
| P00586 | 248  | 1ORB | A | 247  | GPS-SNO  |
| Q9JIF0 | 272  | 1ORH | A | 254  | GPS-SNO  |

|        |     |      |   |     |          |
|--------|-----|------|---|-----|----------|
| Q05586 | 744 | 1PB7 | A | 236 | GPS-SNO  |
| P16331 | 265 | 1PHZ | A | 265 | 20837516 |
| Q9QUR7 | 115 | 1PIN | A | 113 | GPS-SNO  |
| P62962 | 128 | 1PNE | A | 127 | 20837516 |
| Q05769 | 526 | 1PXX | A | 540 | SnoPred  |
| P18760 | 139 | 1Q8G | A | 139 | GPS-SNO  |
| P23528 | 80  | 1Q8G | A | 80  | SnoPred  |
| Q9QUL6 | 91  | 1QDN | A | 91  | SnoPred  |
| Q91X83 | 35  | 1QM4 | A | 35  | 20837516 |
| Q91X83 | 377 | 1QM4 | A | 377 | 20837516 |
| P32119 | 172 | 1QMV | A | 172 | SnoPred  |
| P05062 | 269 | 1QO5 | A | 268 | GPS-SNO  |
| P35505 | 315 | 1QQJ | A | 315 | 20837516 |
| P35505 | 396 | 1QQJ | A | 396 | 20837516 |
| P35505 | 408 | 1QQJ | A | 408 | 20837516 |
| P0A862 | 82  | 1QXH | A | 82  | GPS-SNO  |
| P48500 | 67  | 1R2R | A | 66  | GPS-SNO  |
| Q9QXF8 | 147 | 1R8X | A | 146 | 20837516 |
| Q9QXF8 | 186 | 1R8X | A | 185 | 20837516 |
| Q9QXF8 | 247 | 1R8X | A | 246 | 20837516 |
| Q8R0Y6 | 17  | 1S3I | A | 17  | 20837516 |
| P12814 | 332 | 1SJJ | A | 333 | GPS-SNO  |
| P49429 | 103 | 1SQI | A | 103 | 20837516 |
| O75874 | 297 | 1T09 | A | 297 | SnoPred  |
| O75874 | 379 | 1T09 | A | 379 | SnoPred  |
| Q99LC5 | 109 | 1T9G | R | 109 | 20837516 |
| P68372 | 12  | 1TUB | B | 12  | 20837516 |
| P63018 | 603 | 1UD0 | A | 603 | GPS-SNO  |
| O35490 | 131 | 1UMY | A | 131 | 20837516 |
| O35490 | 256 | 1UMY | A | 256 | 20837516 |
| O35490 | 299 | 1UMY | A | 299 | 20837516 |
| O35490 | 300 | 1UMY | A | 300 | 20837516 |
| O75832 | 107 | 1UOH | A | 107 | SnoPred  |
| P0A7V8 | 32  | 1VS5 | D | 31  | GPS-SNO  |
| P0A7S3 | 27  | 1VS5 | L | 26  | GPS-SNO  |
| P0A7Q1 | 61  | 1VS6 | 3 | 60  | GPS-SNO  |
| P0A7L8 | 53  | 1VS6 | W | 52  | GPS-SNO  |
| P07355 | 133 | 1W7B | A | 133 | SnoPred  |
| Q60676 | 77  | 1WAO | 1 | 77  | GPS-SNO  |
| P05089 | 168 | 1WVA | A | 168 | GPS-SNO  |
| P05089 | 303 | 1WVA | A | 303 | GPS-SNO  |
| Q9DC50 | 210 | 1XMD | A | 210 | 20837516 |
| Q13838 | 165 | 1XTI | A | 165 | GPS-SNO  |
| P50172 | 241 | 1Y5M | A | 241 | 20837516 |

|        |     |      |   |     |          |
|--------|-----|------|---|-----|----------|
| P50172 | 78  | 1Y5M | A | 78  | 20837516 |
| P25113 | 153 | 1YFK | A | 153 | GPS-SNO  |
| P25113 | 55  | 1YFK | A | 55  | GPS-SNO  |
| P05793 | 45  | 1YRL | A | 45  | GPS-SNO  |
| Q00987 | 77  | 1Z1M | A | 77  | GPS-SNO  |
| Q5XIF6 | 347 | 1Z2B | A | 347 | SnoPred  |
| P05065 | 202 | 1ZAH | A | 201 | GPS-SNO  |
| P04406 | 152 | 1ZNP | O | 152 | SnoPred  |
| Q8K2B3 | 238 | 1ZOY | A | 196 | 20837516 |
| Q8K2B3 | 266 | 1ZOY | A | 224 | 20837516 |
| P60422 | 188 | 2AW4 | C | 187 | GPS-SNO  |
| P0A7M9 | 16  | 2AW4 | Z | 16  | GPS-SNO  |
| P0A7M9 | 18  | 2AW4 | Z | 18  | GPS-SNO  |
| P0A7M9 | 37  | 2AW4 | Z | 37  | GPS-SNO  |
| P21399 | 437 | 2B3X | A | 437 | SnoPred  |
| P51859 | 12  | 2B8A | A | 12  | GPS-SNO  |
| P62260 | 192 | 2BR9 | A | 192 | GPS-SNO  |
| P27348 | 134 | 2BTP | A | 134 | GPS-SNO  |
| P27348 | 25  | 2BTP | A | 25  | GPS-SNO  |
| P63102 | 25  | 2C1J | A | 25  | GPS-SNO  |
| P63102 | 94  | 2C1J | A | 94  | GPS-SNO  |
| P0A853 | 298 | 2C44 | A | 298 | GPS-SNO  |
| P68510 | 112 | 2C63 | A | 112 | GPS-SNO  |
| P56965 | 222 | 2C6Z | A | 221 | SnoPred  |
| P56965 | 274 | 2C6Z | A | 273 | SnoPred  |
| Q99683 | 869 | 2CLQ | A | 869 | GPS-SNO  |
| O88844 | 297 | 2CMJ | A | 297 | SnoPred  |
| O88844 | 379 | 2CMJ | A | 379 | SnoPred  |
| Q9Y696 | 234 | 2D2Z | A | 234 | GPS-SNO  |
| P08249 | 89  | 2DFD | A | 71  | 20837516 |
| O14983 | 344 | 2DQS | A | 344 | GPS-SNO  |
| O14983 | 349 | 2DQS | A | 349 | GPS-SNO  |
| Q9WTX5 | 120 | 2E31 | B | 120 | GPS-SNO  |
| Q00981 | 152 | 2ETL | A | 152 | GPS-SNO  |
| P0C8J8 | 149 | 2FIQ | A | 149 | GPS-SNO  |
| P12658 | 100 | 2G9B | A | 100 | GPS-SNO  |
| P09605 | 317 | 2GL6 | A | 317 | GPS-SNO  |
| P47942 | 248 | 2GSE | A | 248 | GPS-SNO  |
| P04271 | 85  | 2H61 | A | 84  | GPS-SNO  |
| Q04206 | 38  | 2I9T | A | 38  | GPS-SNO  |
| Q76MZ3 | 390 | 2IAE | A | 390 | GPS-SNO  |
| P41567 | 69  | 2IF1 | A | 82  | GPS-SNO  |
| P10599 | 62  | 2IFQ | B | 62  | GPS-SNO  |
| P10599 | 69  | 2IFQ | B | 69  | GPS-SNO  |

|        |     |      |   |     |          |
|--------|-----|------|---|-----|----------|
| O94760 | 222 | 2JAJ | A | 221 | GPS-SNO  |
| O94760 | 274 | 2JAJ | A | 273 | GPS-SNO  |
| Q99836 | 216 | 2JS7 | A | 72  | GPS-SNO  |
| Q3U0V1 | 297 | 2JVZ | A | 64  | GPS-SNO  |
| Q61990 | 109 | 2JZX | A | 109 | GPS-SNO  |
| P08839 | 324 | 2KX9 | A | 324 | GPS-SNO  |
| P02639 | 86  | 2L0P | A | 85  | SnoPred  |
| Q01405 | 180 | 2NUP | A | 180 | 20837516 |
| P33937 | 67  | 2NYA | A | 31  | GPS-SNO  |
| P00966 | 132 | 2NZ2 | A | 132 | GPS-SNO  |
| P16460 | 97  | 2NZ2 | A | 97  | 20837516 |
| Q8R0Y6 | 587 | 2O2P | A | 587 | 20837516 |
| Q8R0Y6 | 662 | 2O2P | A | 662 | 20837516 |
| P25372 | 92  | 2OE0 | A | 69  | GPS-SNO  |
| P11926 | 360 | 2OO0 | A | 360 | GPS-SNO  |
| P09373 | 123 | 2PFL | A | 122 | GPS-SNO  |
| P06733 | 357 | 2PSN | A | 356 | SnoPred  |
| P0A7M2 | 5   | 2QOV | Z | 5   | GPS-SNO  |
| Q06830 | 52  | 2RII | A | 52  | GPS-SNO  |
| P15105 | 183 | 2UU7 | A | 183 | 20837516 |
| P15105 | 346 | 2UU7 | A | 346 | 20837516 |
| P15105 | 99  | 2UU7 | A | 99  | 20837516 |
| P28651 | 201 | 2W2J | A | 200 | GPS-SNO  |
| Q03265 | 244 | 2W6E | A | 201 | 20837516 |
| P61620 | 13  | 2WWB | A | 13  | 20837516 |
| P10415 | 158 | 2XA0 | A | 158 | GPS-SNO  |
| P00558 | 108 | 2XE6 | A | 107 | GPS-SNO  |
| P00558 | 50  | 2XE6 | A | 49  | GPS-SNO  |
| P21817 | 314 | 2XOA | A | 315 | GPS-SNO  |
| P21817 | 35  | 2XOA | A | 36  | GPS-SNO  |
| P69897 | 12  | 2XRP | A | 12  | GPS-SNO  |
| P69897 | 239 | 2XRP | A | 241 | GPS-SNO  |
| P69897 | 303 | 2XRP | A | 305 | GPS-SNO  |
| P69897 | 354 | 2XRP | A | 356 | GPS-SNO  |
| P49185 | 116 | 2XS0 | A | 116 | SnoPred  |
| Q9ET01 | 446 | 2ZB2 | A | 445 | 20837516 |
| P09411 | 50  | 2ZGV | A | 49  | 20837516 |
| P21708 | 179 | 2ZOQ | A | 178 | SnoPred  |
| P12277 | 254 | 3B6R | A | 254 | SnoPred  |
| Q8VDN2 | 663 | 3B8E | A | 656 | 20837516 |
| Q8VDN2 | 705 | 3B8E | A | 698 | 20837516 |
| Q05920 | 663 | 3BG3 | A | 663 | 20837516 |
| Q05920 | 752 | 3BG3 | A | 752 | 20837516 |
| P59215 | 140 | 3C7K | A | 140 | SnoPred  |



|        |     |      |   |     |          |
|--------|-----|------|---|-----|----------|
| P63017 | 17  | 3C7N | B | 17  | 20837516 |
| Q16623 | 145 | 3C98 | B | 145 | GPS-SNO  |
| Q99MK8 | 120 | 3CIK | A | 120 | GPS-SNO  |
| P25098 | 340 | 3CIK | A | 340 | 19854201 |
| Q99MK8 | 439 | 3CIK | A | 439 | GPS-SNO  |
| Q99MK8 | 619 | 3CIK | A | 619 | GPS-SNO  |
| Q99MK8 | 72  | 3CIK | A | 72  | GPS-SNO  |
| P63242 | 73  | 3CPF | A | 73  | GPS-SNO  |
| P29680 | 50  | 3CYV | A | 50  | GPS-SNO  |
| Q07009 | 301 | 3DF0 | A | 301 | GPS-SNO  |
| P11517 | 126 | 3DHT | B | 125 | GPS-SNO  |
| P11517 | 94  | 3DHT | B | 93  | GPS-SNO  |
| P20337 | 137 | 3DZ8 | A | 137 | SnoPred  |
| Q9Z0X1 | 255 | 3GD3 | A | 255 | 20837516 |
| O15519 | 254 | 3H11 | A | 254 | GPS-SNO  |
| O15519 | 259 | 3H11 | A | 259 | GPS-SNO  |
| P68370 | 295 | 3HKB | A | 295 | GPS-SNO  |
| P68370 | 315 | 3HKB | A | 315 | GPS-SNO  |
| P68370 | 316 | 3HKB | A | 316 | GPS-SNO  |
| P68370 | 347 | 3HKB | A | 347 | GPS-SNO  |
| P68370 | 376 | 3HKB | A | 376 | GPS-SNO  |
| P02088 | 94  | 3HRW | B | 93  | 20837516 |
| P23284 | 202 | 3ICH | A | 170 | GPS-SNO  |
| P0A7Z4 | 176 | 3IYD | A | 176 | GPS-SNO  |
| O35215 | 24  | 3KER | A | 23  | 20837516 |
| O35215 | 57  | 3KER | A | 56  | 20837516 |
| Q9GZT4 | 113 | 3L6B | A | 113 | GPS-SNO  |
| P21980 | 10  | 3LY6 | A | 10  | GPS-SNO  |
| Q92769 | 262 | 3MAX | A | 266 | GPS-SNO  |
| Q92769 | 274 | 3MAX | A | 278 | GPS-SNO  |
| P01009 | 256 | 3NE4 | A | 232 | GPS-SNO  |
| P29474 | 184 | 3NOS | A | 184 | SnoPred  |
| P29474 | 201 | 3NOS | A | 201 | SnoPred  |
| P29474 | 212 | 3NOS | A | 212 | SnoPred  |
| P29474 | 235 | 3NOS | A | 235 | SnoPred  |
| P29474 | 382 | 3NOS | A | 382 | SnoPred  |
| P29474 | 94  | 3NOS | A | 94  | SnoPred  |
| P29474 | 99  | 3NOS | A | 99  | SnoPred  |
| P63085 | 159 | 3O71 | A | 159 | GPS-SNO  |
| P61080 | 85  | 3OJ4 | A | 85  | GPS-SNO  |
| P05202 | 106 | 3PD6 | A | 106 | 20837516 |
| P05202 | 187 | 3PD6 | A | 187 | 20837516 |
| P05202 | 295 | 3PD6 | A | 295 | 20837516 |
| P56558 | 610 | 3PE3 | A | 610 | GPS-SNO  |

|        |     |      |   |     |          |
|--------|-----|------|---|-----|----------|
| Q91V92 | 623 | 3PFF | A | 633 | 20837516 |
| P61765 | 110 | 3PUJ | A | 110 | GPS-SNO  |
| P07900 | 481 | 3Q6M | A | 481 | GPS-SNO  |
| P07900 | 597 | 3Q6M | A | 597 | GPS-SNO  |
| P07900 | 598 | 3Q6M | A | 598 | GPS-SNO  |
| P00533 | 190 | 3QWQ | A | 166 | GPS-SNO  |
| P00533 | 329 | 3QWQ | A | 305 | GPS-SNO  |
| Q9I4E3 | 249 | 3RHY | A | 249 | GPS-SNO  |
| O08749 | 484 | 3RNM | A | 449 | 20837516 |
| Q6P9V9 | 295 | 3RYC | A | 295 | SnoPred  |
| Q6P9V9 | 347 | 3RYC | A | 347 | SnoPred  |
| Q6P9V9 | 376 | 3RYC | A | 376 | SnoPred  |
| P21980 | 143 | 3S3J | A | 143 | GPS-SNO  |
| P21980 | 230 | 3S3J | A | 230 | GPS-SNO  |
| P21980 | 269 | 3S3J | A | 269 | GPS-SNO  |
| P21980 | 27  | 3S3J | A | 27  | GPS-SNO  |
| P21980 | 277 | 3S3J | A | 277 | GPS-SNO  |
| P21980 | 285 | 3S3J | A | 285 | GPS-SNO  |
| P21980 | 336 | 3S3J | A | 336 | GPS-SNO  |
| P21980 | 370 | 3S3J | A | 370 | GPS-SNO  |
| P21980 | 371 | 3S3J | A | 371 | GPS-SNO  |
| P21980 | 524 | 3S3J | A | 524 | GPS-SNO  |
| P21980 | 545 | 3S3J | A | 545 | GPS-SNO  |
| P21980 | 620 | 3S3J | A | 620 | GPS-SNO  |
| P21980 | 98  | 3S3J | A | 98  | GPS-SNO  |
| Q99020 | 104 | 3S7R | A | 98  | SnoPred  |
| P05161 | 78  | 3SDL | C | 78  | GPS-SNO  |
| Q99497 | 46  | 3SF8 | B | 46  | SnoPred  |
| Q99497 | 53  | 3SF8 | B | 53  | SnoPred  |
| P68036 | 86  | 3SQV | C | 86  | GPS-SNO  |
| P14618 | 49  | 3SRD | A | 49  | SnoPred  |
| P11980 | 326 | 3SRF | C | 325 | GPS-SNO  |
| P11980 | 358 | 3SRF | C | 357 | GPS-SNO  |
| P11980 | 423 | 3SRF | C | 422 | GPS-SNO  |
| P11980 | 474 | 3SRF | C | 473 | GPS-SNO  |
| P11980 | 49  | 3SRF | C | 48  | GPS-SNO  |
| P49187 | 117 | 3TTJ | A | 117 | SnoPred  |
| P60710 | 217 | 3U4L | A | 217 | GPS-SNO  |
| P60710 | 257 | 3U4L | A | 257 | GPS-SNO  |
| P60710 | 272 | 3U4L | A | 272 | GPS-SNO  |
| P60710 | 285 | 3U4L | A | 285 | GPS-SNO  |
| P07323 | 357 | 3UCC | A | 356 | GPS-SNO  |
| P07237 | 400 | 3UEM | A | 400 | GPS-SNO  |
| P02769 | 288 | 3V03 | A | 264 | GPS-SNO  |

---

|        |     |      |   |     |          |
|--------|-----|------|---|-----|----------|
| P02769 | 58  | 3V03 | A | 34  | GPS-SNO  |
| P02769 | 392 | 3V03 | A | 368 | GPS-SNO  |
| P02769 | 471 | 3V03 | A | 447 | GPS-SNO  |
| Q8CHT0 | 94  | 3V9J | A | 95  | 20837516 |
| Q05193 | 607 | 3ZVR | A | 607 | SnoPred  |
| P04642 | 163 | 4AJ4 | A | 162 | GPS-SNO  |
| P06151 | 35  | 4AJ4 | A | 34  | 20837516 |
| P05064 | 339 | 4ALD | A | 338 | GPS-SNO  |
| P35557 | 371 | 4DCH | A | 371 | GPS-SNO  |
| P42574 | 163 | 4EHH | A | 163 | GPS-SNO  |
| P31749 | 224 | 4EJN | A | 224 | GPS-SNO  |
| P31749 | 296 | 4EJN | A | 296 | GPS-SNO  |
| P31749 | 310 | 4EJN | A | 310 | GPS-SNO  |
| P01112 | 118 | 4Q21 | A | 118 | SnoPred  |
| O88989 | 137 | 5MDH | A | 136 | GPS-SNO  |
| O88989 | 154 | 5MDH | A | 153 | GPS-SNO  |
| P43235 | 139 | 7PCK | A | 25  | GPS-SNO  |

---
